# Supplementary material for: Effective Degradation of Cellulose by Microwave Irradiation in Alkaline Solution
Source: Research Square preprint supplement (doi:10.21203/rs.3.rs-613178/v1), 2021-07-19
Supplement: Supplementary file 1 [file cb7c9bcf0db565f129436c27.docx]

**Effective degradation of cellulose by Microwave irradiation in alkaline solution**

Lama Jabareen, Moorthy Maruthapandi, Arumugam Saravanan, Aharon Gedanken*

Department of Chemistry, Bar-Ilan Institute for Nanotechnology and Advanced Materials (BINA), Bar-Ilan University, Ramat-Gan 52900, Israel.

* Corresponding authors: [gedanken@mail.biu.ac.il](mailto:gedanken@mail.biu.ac.il), Fax: +972-3-7384053; Tel: +972-3-5318315


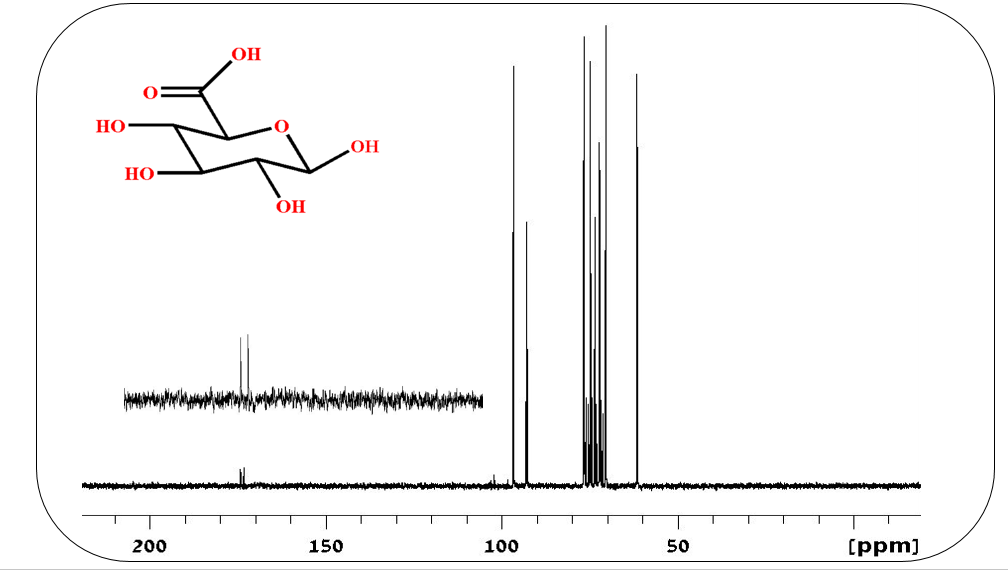


Figure S1. 13C NMR spectrum for the oxidized glucose.


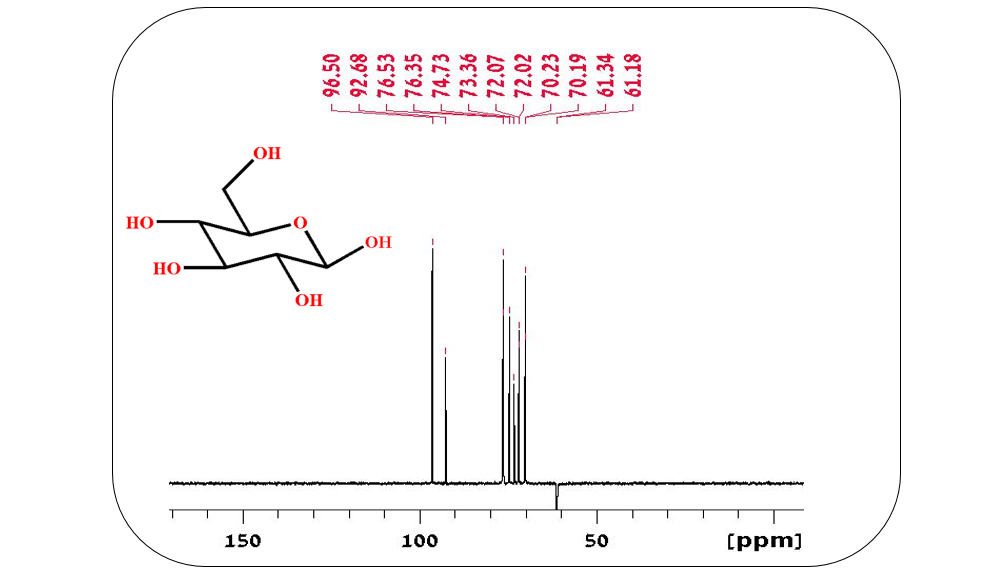


Figure S2. 13C NMR spectrum for the glucose.

The NMR peaks in figure S2 (61, 70, 72, 73, 74, 76 and 96 ppm) are represent the glucose carbons. Fig.S2 illustrates the 13C NMR spectrum of the glucose after the oxidation, the peaks in the spectrum belong to glucose carbons and glucuronic acid carbons, the peak at 173 ppm assigned for the carboxyl carbon of the glucuronic acid.
